# Supplementary material for: Plasticity between MyoC- and MyoA-Glideosomes: An Example of Functional Compensation in Toxoplasma gondii Invasion
Source: PubMed Central journal article supplement (PMC4231161; doi:10.1371/journal.ppat.1004504), 2014-11-13

# Supplementary figure S4

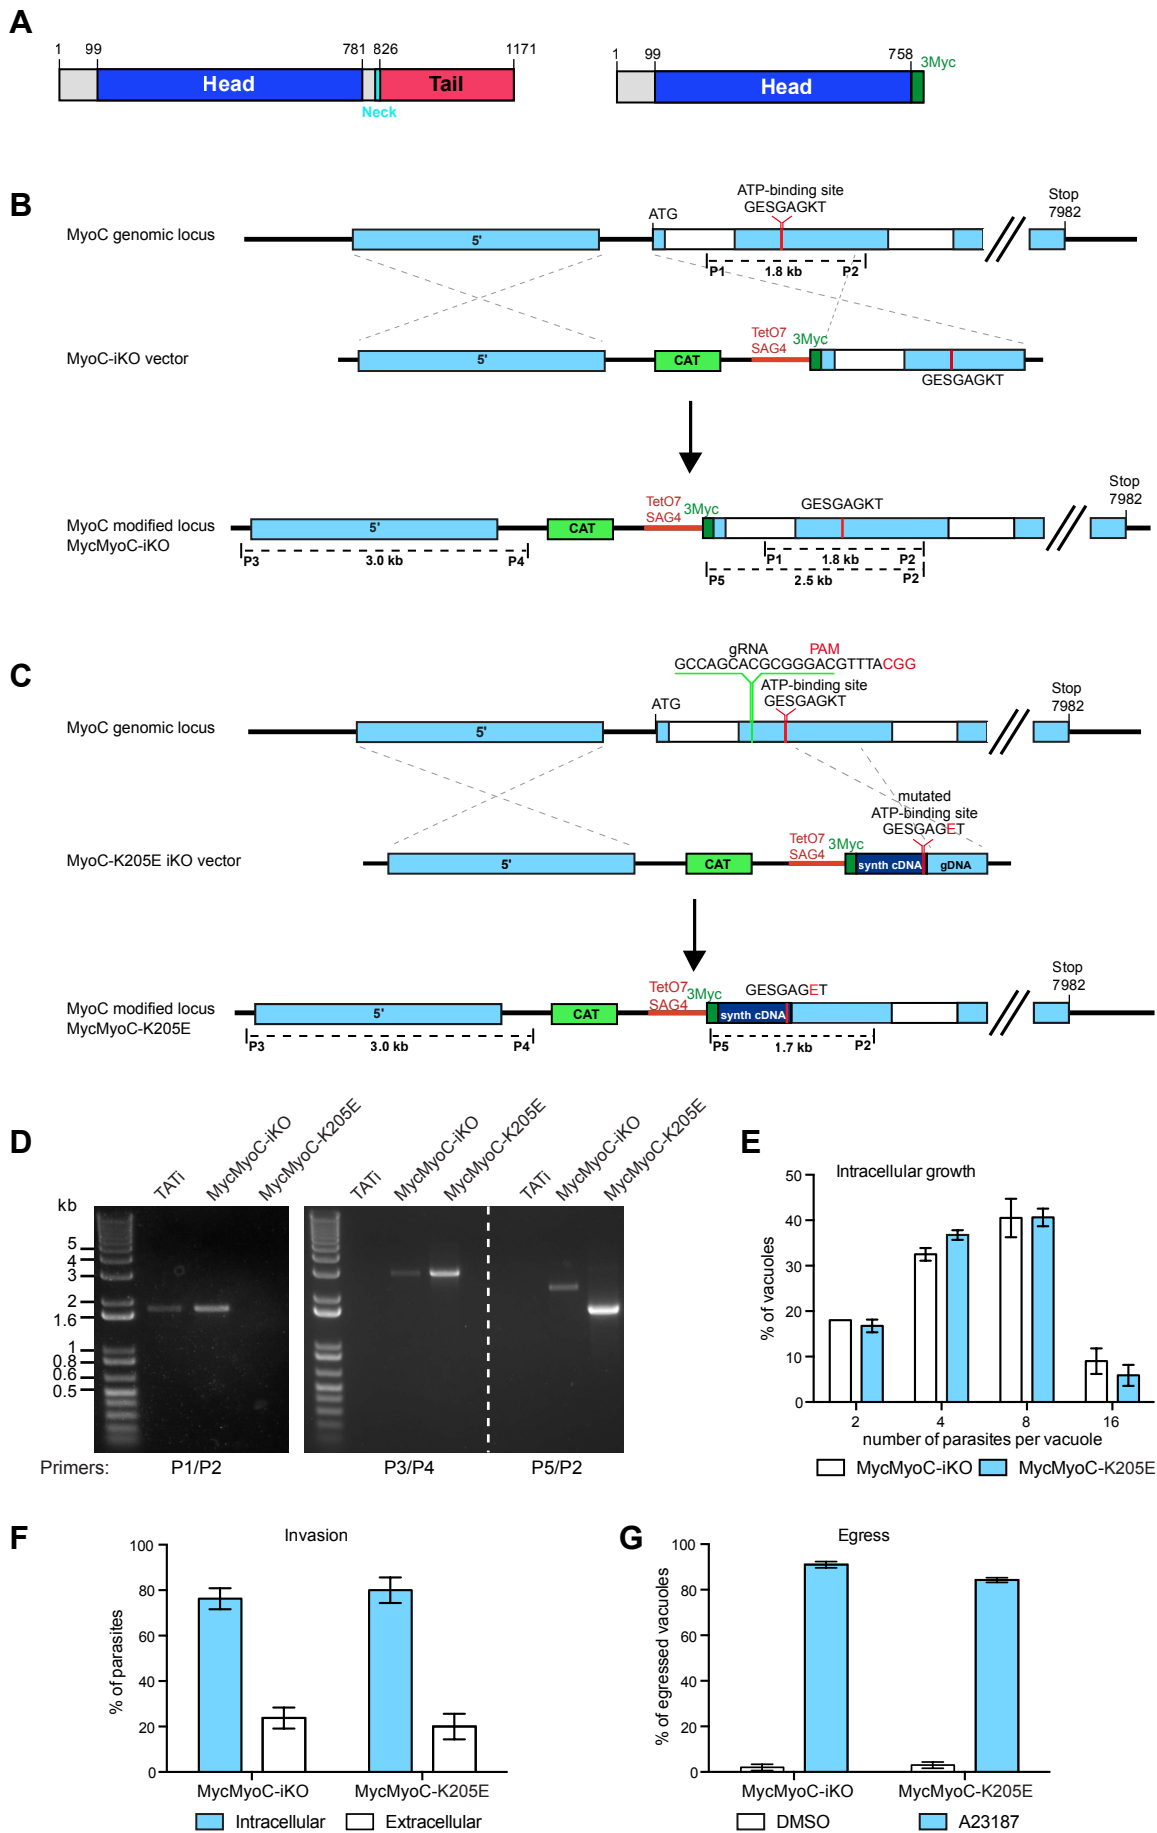

Supplement: ppat.1004504.s004.pdf [file ppat.1004504.s004.pdf]
