# Supplementary material for: Plasticity between MyoC- and MyoA-Glideosomes: An Example of Functional Compensation in Toxoplasma gondii Invasion
Source: PubMed Central journal article supplement (PMC4231161; doi:10.1371/journal.ppat.1004504), 2014-11-13
Supplement: ppat.1004504.s008.pdf [file ppat.1004504.s008.pdf]

**Table S1.** Identification of MyoC and GAP80 by mass spectrometry after co-IP performed with anti-Ty antibodies on parasites stably expressing TgMLC1Ty.

| Protein identification  | Number of unique peptides | List of peptides                                                                                                                                                                                                                                                                                                                                                                                                                                                                                                                                               |
|-------------------------|---------------------------|----------------------------------------------------------------------------------------------------------------------------------------------------------------------------------------------------------------------------------------------------------------------------------------------------------------------------------------------------------------------------------------------------------------------------------------------------------------------------------------------------------------------------------------------------------------|
| TGME49_255190<br>MyoB/C | 31 (33% coverage)         | AATNFTCWTADCPAVK<br>ALFEGIEIEAGK<br>DLGNTTDAWISTYR<br>DVSYLIGMLFQR (specific to MyoC)<br>EALLSGMERPR<br>EVAQLLLEQSGIPESSWVIGK<br>FMMLDVSSHR<br>GIQHGSISNFLLEK<br>HLEPDSINISPEER<br>HTIADIEYTCEGMLEK<br>LEPSGFFLESR<br>LYQAEGVPTEALEYTDNLALVGCALCGK<br>NASKPEMLPPHVK<br>NDSFFALLEDACLGR<br>NFSEFCSHFR<br>NPCVVVK<br>NQSIIVSGESGAGKTEATK<br>RHLEPDSINISPEER<br>RLEPSGFFLESR<br>RLQNICTVIR<br>RPSHVCMEEAYHVWR<br>SIIYTAEPLLVAINPFK<br>SYHIFYQLLK<br>TMVFVKPDAAK<br>TTIQDTIMAGNPILEAFGNAK<br>VGPQVIEGVR<br>VIHFLTR<br>VLNQLFSLILEALQLR<br>VVSQEANER<br>WLDLGLVNSDR |
| TGME49_246940<br>GAP80  | 7 (27% coverage)          | AAQEIPAKQPEEEEEETQIPLR<br>AEDLGEAPLSRPASIPVEMTTR<br>DFDFSDIPVLQ<br>EASQEVQLVNRDPVPVSPPPK<br>LAELETLQTLAEVTTYR<br>NPFGFCFGGGK<br>TRAEDLGEAPLSRPASIPVEMTTR                                                                                                                                                                                                                                                                                                                                                                                                       |

Accession numbers are from EupathDB (Aurrecochea et al., 2007).
