# Supplementary material for: Plasticity between MyoC- and MyoA-Glideosomes: An Example of Functional Compensation in Toxoplasma gondii Invasion
Source: PubMed Central journal article supplement (PMC4231161; doi:10.1371/journal.ppat.1004504), 2014-11-13
Supplement: ppat.1004504.s010.pdf [file ppat.1004504.s010.pdf]

**Table S3.** Identification of IAP1 by mass spectrometry after co-IP performed with anti-Myc antibodies on parasites stably expressing MycGFPCtGAP80.

| Protein identification | Number of unique peptides | List of peptides                                                                                                |
|------------------------|---------------------------|-----------------------------------------------------------------------------------------------------------------|
| TGME49_283510<br>IAP1  | 7 (28% coverage)          | EAVAGFSIER<br>FLTTIDLR<br>GDDAVSHSSITGDCDLNR<br>LQALVKEFAK<br>LSFDIAR<br>QGTTPLELQSTSAKPPYR<br>SKAFDGDGSVPPMSPA |

Accession numbers are from EupathDB (Aurrecoechea et al., 2007).
